# Supplementary material for: Bathymetry observations of inland water bodies using a tetheredsingle-beam sonar controlled by an Unmanned Aerial Vehicle
Source: Copernicus journal article supplement (doi:10.5194/hess-2017-625), 2017-11-01
Supplement: Supplementary file 1 [file error_propagation.xlsx]

## Sheet: error propagation
								Δf is the maximum error on the function f
		Generic formula						Δx is the error on the variable x of the function f
								N is the number of variables of f
		Formula			eq.				Error estimation
					1
					3
					5
					6
					7
									Δα=Δb+Δf
					8
					9
		Northing_sonar=GNSS_northing+y							ΔNorthing=ΔGNSS_horiz+Δy
		Easting_sonar=GNSS_easting+x							ΔEasting=ΔGNSS_horiz+Δx

## Sheet: uncertainty WFOV caused by OD 
Generic formula
error propagation
maximum error
OD [m]	ΔOD [%]	ΔOD [m]
5	0.005	0.025
F [m]	W sens [m]	H sens [m]	n_pix_w		pix_w			pix_w			pix_w
0.035	0.0132	0.0088	1000		100			500			1000
1.88571	[m]				0.188571	[m]		0.942857			1.88571
Δ(WFOV)=Wsens*Δ(OD)/F					Δ(Lw)=(pix_w/n_pix_w)*Δ(WFOV)			Δ(Lw)=(pix_w/n_pix_w)*Δ(WFOV)			Δ(Lw)=(pix_w/n_pix_w)*Δ(WFOV)
0.00942857	[m]				0.000942857			0.00471429			0.00942857			small error due to OD but Lw and Lh have 3% uncertainty due to uncorrected lens distorsion, focus and focal length not equal to image distance (distance between lens and image plane)

## Sheet: uncertainy on phi and L
Generic formula
error propagation
maximum error
	L (offset between camera and sonar on the horizontal plane)
Lh [m]	Lw [m]	L (max) [m]							Lh and Lw error (%)
1	1.73205	2							0.03
Δ Lh [m]	ΔLw [m]								f=arctg(Lw/Lh)		min f		max f
0.03	0.0519615								1.0472		58.4891		61.4663
									rad		degree		degree
Δ phi [rad]									60
0.0259808									degree
Δ phi [degree]		b [rad]				α [rad]
1.48859		2				3.0472
		sin(90-alpha)	cos(90-alpha)
		-0.995548	0.094255
Δ L [m]		Δ sin(90-alpha)	Δ cos(90-alpha)					Δb [rad]		0.0523599	rad
0.06		0.007384	0.0779919					Δb[grad]		3	grad
								Δα [rad]		0.0783406	rad
								Δα[grad]		4.48859	grad
	y [m]			Δy [m]
	-1.9911			0.0745009
	x [m]			Δx [m]
	0.18851			0.161639
		Absolute sonar coordinates
Drone GNSS horizontal position accuracy [m]	0.02
			Δ northing position sonar [m]
			0.0945009
			Δ easting [m]
			0.181639
